# Supplementary material
Source: Springer Nature journal article supplement (https://www.springermedizin.de/resource/supplementary/12889_2010_2462_MOESM3_ESM.pdf/9485958)
Supplement: MOESM3 [file 9485958]

**Table 3 Coexistence of allergic disease in children age 0-14 years in Beijing,**

**Chongqing and Guangzhou**

| Coexistence                               | Beijing |          | Chongqing |          | Guangzhou |          | $\chi^2$ | P      |
|-------------------------------------------|---------|----------|-----------|----------|-----------|----------|----------|--------|
| Rhinitis in asthmatic children            | 161     | (49.54%) | 368       | (50.14%) | 31        | (34.83%) | 22021.76 | <0.001 |
| Eczema in asthmatic children              | 147     | (45.23%) | 237       | (32.29%) | 17        | (19.10%) | 22655.07 | <0.001 |
| Rhinitis and Eczema in asthmatic children | 75      | (23.08%) | 156       | (21.25%) | 9         | (10.11%) | 23304.58 | <0.001 |
